# Supplementary material for: Investigation of the effectiveness of the “Girls on the Go!” program for building self-esteem in young women: trial protocol
Source: PubMed Central journal article supplement (PMC3877412; doi:10.1186/2193-1801-2-683), 2013-12-19
Supplement: 40064_2013_751_MOESM1_ESM.pdf [file 40064_2013_751_MOESM1_ESM.pdf]

# 2009-2010

Schools  
requesting the  
program

| School<br>1a* | School<br>2a | School<br>3a | School<br>1b | School<br>2b | School<br>3b |
|---------------|--------------|--------------|--------------|--------------|--------------|
|---------------|--------------|--------------|--------------|--------------|--------------|

2010 June

Data collection point 1 (baseline )

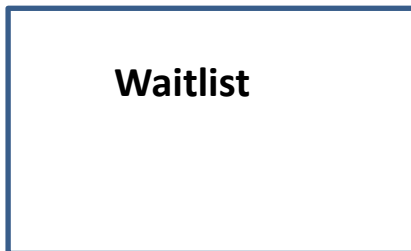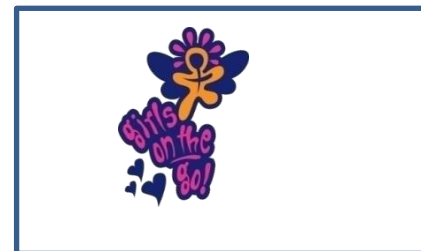

2010  
September

Data collection point 2 (3 months )

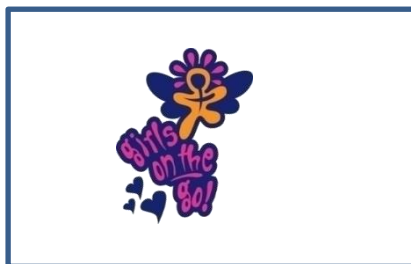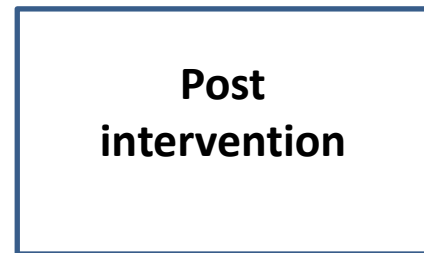

2010  
December

Data collection point 3 (6 months )
