# Supplementary material for: Investigation of the effectiveness of the “Girls on the Go!” program for building self-esteem in young women: trial protocol
Source: PubMed Central journal article supplement (PMC3877412; doi:10.1186/2193-1801-2-683), 2013-12-19
Supplement: 40064_2013_751_MOESM2_ESM.pdf [file 40064_2013_751_MOESM2_ESM.pdf]

**2010**

Schools requesting  
the program

| School 1a* | School 2a | School 3a | School 1b | School 2b | School 3b |
|------------|-----------|-----------|-----------|-----------|-----------|
|------------|-----------|-----------|-----------|-----------|-----------|

2011 March

Data collection point 1 (baseline )

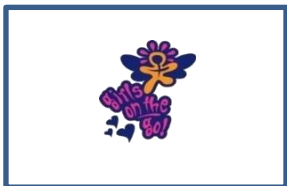

Waitlist

Waitlist

2011 June

Data collection point 2 (3 months )

Post  
intervention

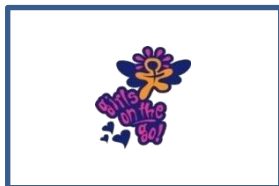

Waitlist

2011 July

Data collection point 3 (6 months )

Post  
intervention

Post  
intervention

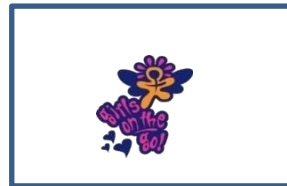

2011 December

Data collection point 4 (9 months )
